# Supplementary material
Source: Springer Nature journal article supplement (https://www.springermedizin.de/resource/supplementary/12887_2011_616_MOESM1_ESM.pdf/9475854)
Supplement: MOESM1 [file 9475854]

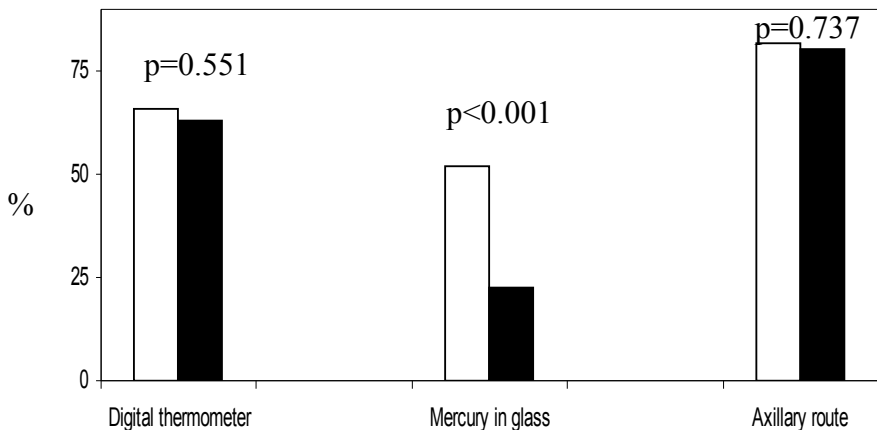

A. Thermometer type and site to measure body temperature

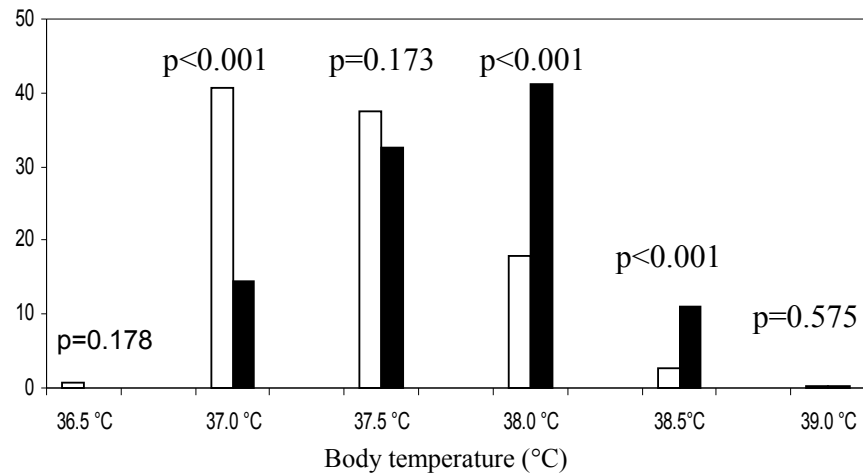

B. Fever definition

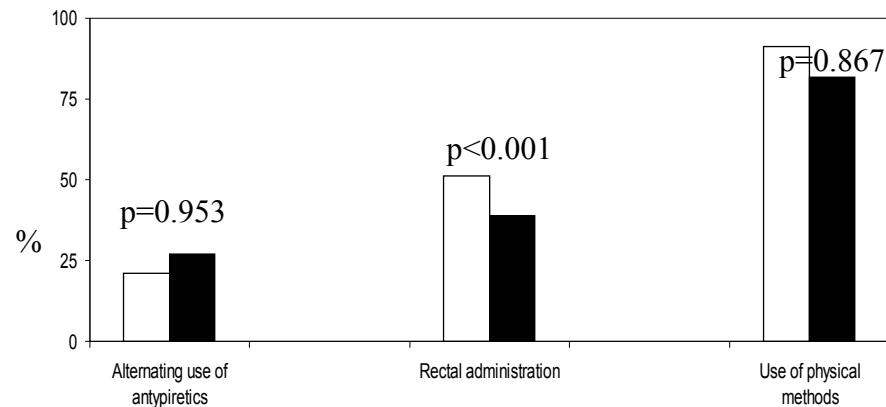

C. Alternating use of drugs, rectal administration and use of physical methods

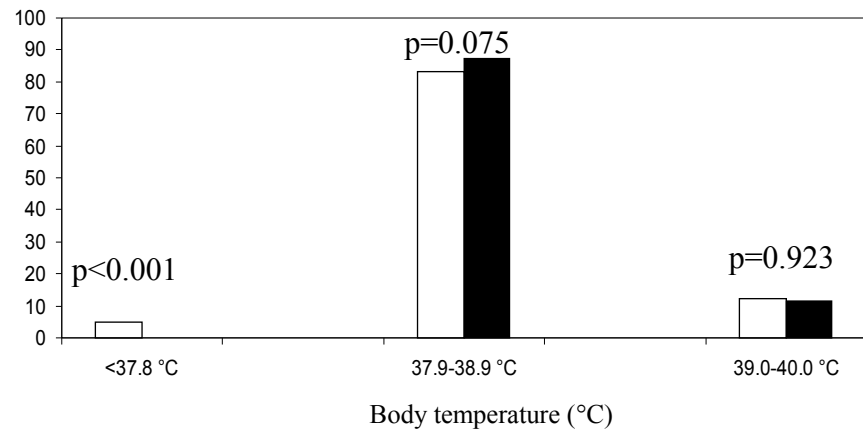

D. Body temperature's cut off for the use of antipyretics

□ parents (n=388)

■ paediatricians (n=480)
